# Supplementary material for: Can the introduction of a 12-lead ECG help reduce mortality in those presenting with foot ulceration to multidisciplinary diabetic foot clinics? An observational evaluation of a real-world implementation pilot in England
Source: PubMed Central journal article supplement (PMC11153259; doi:10.1007/s00125-024-06134-3), 2024-04-08
Supplement: 125_2024_6134_MOESM1_ESM.pdf [file 125_2024_6134_MOESM1_ESM.pdf]

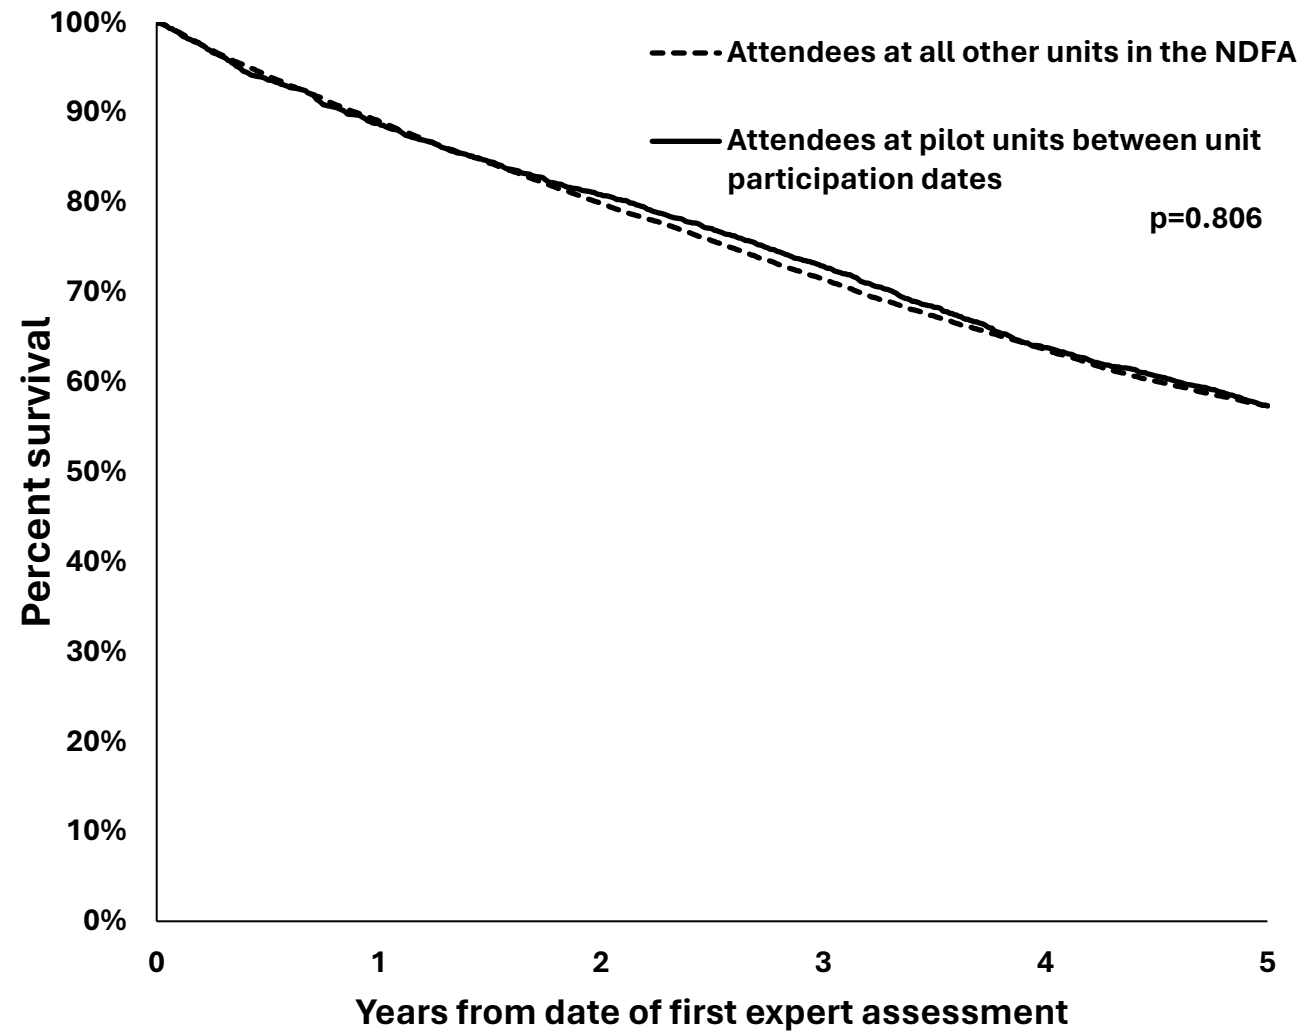

**ESM Fig. 1:** Kaplan–Meier plot representing unadjusted mortality over the full 5-year follow-up period for those who underwent first expert assessment in a pilot unit while it was undertaking 12-lead ECGs compared with those from other units in England participating in the National Diabetes Footcare Audit (NDFA)
